# Supplementary material
Source: PubMed Central journal article supplement (PMC4442062)
Supplement: NIHMS664890-supplement-01.pdf [file NIHMS664890-supplement-01.pdf]

**eTable 1. Diagnostician and age of diagnosis of non-RTT and *MECP2* duplication participants.****Non-RTT females**

| <b>Diagnostician</b>        | <b>Number</b> | <b>Percent</b> | <b>Median Age (y)</b> | <b>Interquartile Range</b> | <b>Minimum Age</b> | <b>Maximum Age</b> |
|-----------------------------|---------------|----------------|-----------------------|----------------------------|--------------------|--------------------|
| Pediatrician                | 3             | 7.3%           | 5.8                   | n.c.                       | 4.2                | 5.9                |
| Developmental pediatrician  | 10            | 24.4%          | 6.0                   | 2.9-15.9                   | 1.3                | 17.4               |
| Neurologist                 | 18            | 43.9%          | 5.0                   | 2.8-16.5                   | 1.0                | 51.6               |
| Geneticist                  | 9             | 22.0%          | 3.9                   | 3.3-27.3                   | 1.2                | 30.0               |
| Other specialist            | 1             | 2.4%           | 6.7                   | n.c.                       | n.c.               | n.c.               |
| Other primary care provider | 0             |                |                       |                            |                    |                    |
| Family member or teacher    | 0             |                |                       |                            |                    |                    |
| <b>Overall</b>              | <b>41</b>     | <b>100.0%</b>  | <b>5.4</b>            | <b>3.0-14.4</b>            | <b>1.0</b>         | <b>51.6</b>        |

**Non-RTT males**

| <b>Diagnostician</b>        | <b>Number</b> | <b>Percent</b> | <b>Median Age (y)</b> | <b>Interquartile Range</b> | <b>Minimum Age</b> | <b>Maximum Age</b> |
|-----------------------------|---------------|----------------|-----------------------|----------------------------|--------------------|--------------------|
| Pediatrician                | 2             | 10.0%          | n.c.                  | n.c.                       | 1.3                | 4.2                |
| Developmental pediatrician  | 2             | 10.0%          | n.c.                  | n.c.                       | 11.9               | 20.4               |
| Neurologist                 | 5             | 25.0%          | 4.7                   | 2.6-9.2                    | 1.6                | 12.7               |
| Geneticist                  | 9             | 45.0%          | 2.2                   | 0.9-3.1                    | 0.7                | 4.3                |
| Other specialist            | 2             | 10.0%          | n.c.                  | n.c.                       | 4.4                | 18.1               |
| Other primary care provider | 0             |                |                       |                            |                    |                    |
| Family member or teacher    | 0             |                |                       |                            |                    |                    |
| Missing                     | 0             |                |                       |                            |                    |                    |
| <b>Overall</b>              | <b>20</b>     | <b>100.0%</b>  | <b>3.5</b>            | <b>1.5-5.5</b>             | <b>0.7</b>         | <b>20.4</b>        |

**eTable 1 continued.**

**MECP2 duplication females**

| <b>Diagnostician</b>        | <b>Number</b> | <b>Percent</b> | <b>Median Age (y)</b> | <b>Interquartile Range</b> | <b>Minimum Age</b> | <b>Maximum Age</b> |
|-----------------------------|---------------|----------------|-----------------------|----------------------------|--------------------|--------------------|
| Pediatrician                | 0             |                |                       |                            |                    |                    |
| Developmental pediatrician  | 0             |                |                       |                            |                    |                    |
| Neurologist                 | 3             | 42.9%          | 37.1                  | n.c.                       | 4.5                | 40.6               |
| Geneticist                  | 4             | 57.1%          | 38.5                  | n.c.                       | 1.2                | 64.8               |
| Other specialist            | 0             |                |                       |                            |                    |                    |
| Other primary care provider | 0             |                |                       |                            |                    |                    |
| Family member or teacher    | 0             |                |                       |                            |                    |                    |
| Missing                     | 0             |                |                       |                            |                    |                    |
| <b>Overall</b>              | <b>7</b>      | <b>100.0%</b>  | <b>37.8</b>           | <b>3.7-46.6</b>            | <b>1.2</b>         | <b>64.8</b>        |

**MECP2 duplication males**

| <b>Diagnostician</b>        | <b>Number</b> | <b>Percent</b> | <b>Median Age (y)</b> | <b>Interquartile Range</b> | <b>Minimum Age</b> | <b>Maximum Age</b> |
|-----------------------------|---------------|----------------|-----------------------|----------------------------|--------------------|--------------------|
| Pediatrician                | 0             |                |                       |                            |                    |                    |
| Developmental pediatrician  | 4             | 14.3%          | 9.0                   | 3.8-14.7                   | 3.2                | 15.5               |
| Neurologist                 | 9             | 32.1%          | 7.3                   | 3.2-10.5                   | 0.6                | 14.8               |
| Geneticist                  | 15            | 53.6%          | 7.5                   | 1.6-13.5                   | 0.5                | 20.0               |
| Other specialist            | 0             |                |                       |                            |                    |                    |
| Other primary care provider | 0             |                |                       |                            |                    |                    |
| Family member or teacher    | 0             |                |                       |                            |                    |                    |
| Missing                     | 0             |                |                       |                            |                    |                    |
| <b>Overall</b>              | <b>28</b>     | <b>100.0%</b>  | <b>7.3</b>            | <b>2.9-12.0</b>            | <b>0.5</b>         | <b>20.0</b>        |

n.c. = not calculated

**eTable 2. Demographic characteristics of population and diagnostic category (Total N=1087).**

|                    |                                            | <b>Classic</b> |     | <b>Atypical</b> |     |
|--------------------|--------------------------------------------|----------------|-----|-----------------|-----|
|                    |                                            | <b>(n=919)</b> |     | <b>(n=166)</b>  |     |
| Ethnicity          | Neither Hispanic, Latino or Spanish origin | 783            | 85% | 141             | 85% |
|                    | Hispanic, Latino, or Spanish origin        | 136            | 15% | 25              | 15% |
| Race               | Unknown or refused                         | 23             | 3%  | 4               | 2%  |
|                    | American Indian                            | 6              | 1%  | 2               | 1%  |
|                    | Asian                                      | 35             | 4%  | 4               | 2%  |
|                    | African American                           | 43             | 5%  | 9               | 5%  |
|                    | Hawaiian or Pacific Islander               | 2              | <1% | 0               | 0%  |
|                    | White                                      | 757            | 82% | 142             | 86% |
|                    | Mixed race                                 | 53             | 6%  | 5               | 3%  |
|                    |                                            |                |     |                 |     |
| Primary Residence  | Home                                       | 898            | 98% | 163             | 98% |
|                    | Group home                                 | 18             | 2%  | 0               | 0%  |
|                    | Institution                                | 3              | <1% | 3               | 2%  |
| Population Density | Rural                                      | 404            | 48% | 66              | 45% |
|                    | Suburban                                   | 241            | 29% | 45              | 30% |
|                    | Urban                                      | 193            | 23% | 37              | 25% |
| Estimated Income   | Below national median                      | 348            | 42% | 60              | 41% |
|                    | Middle class                               | 340            | 41% | 67              | 45% |
|                    | Upper middle class                         | 138            | 17% | 21              | 14% |

Data do not sum to total number of participants in all cases due to missing data.

### **Characteristics of diagnosis**

***Distribution:*** Participants were diagnosed between 1983 and 2013. Age of diagnosis ranged from 7 months to 53.0 years. Median age of diagnosis was 2.7 years (IQR 2.0 – 4.1) in classic and 3.8 years (IQR 2.3 – 6.9) in atypical RTT (Table 2).
